# Supplementary material
Source: publisher site journal article supplement (https://spandidos-publications.com/3646/downloadSupplementary)

Figure S1. TLR4 mRNA expression after si-TLR4 transfection. \*\*\* $P < 0.001$  vs. si-NC. TLR4, toll-like receptor 4; si-, small interfering RNA; NC, negative control; si-NC, the cells were transfected with the non-targeting si-negative control sequence; si-TLR4, the cells were transfected with si-TLR4.

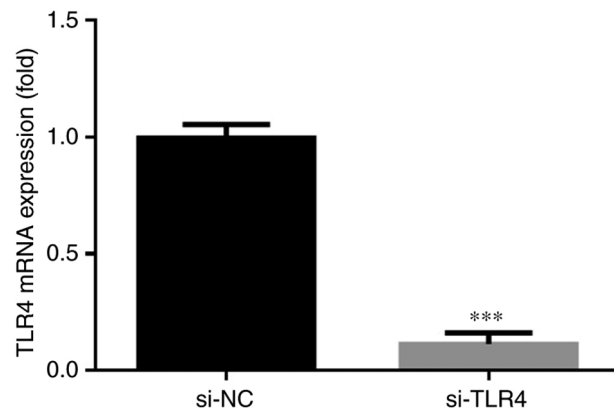

Supplement: Supplementary file 1 [file downloadSupplementary]
